# Supplementary material for: Apigenin Loaded Lipoid–PLGA–TPGS Nanoparticles for Colon Cancer Therapy: Characterization, Sustained Release, Cytotoxicity, and Apoptosis Pathways
Source: MDPI journal article supplement (doi:10.3390/polym14173577), 2022-08-30
Supplement: s1 [file s1]

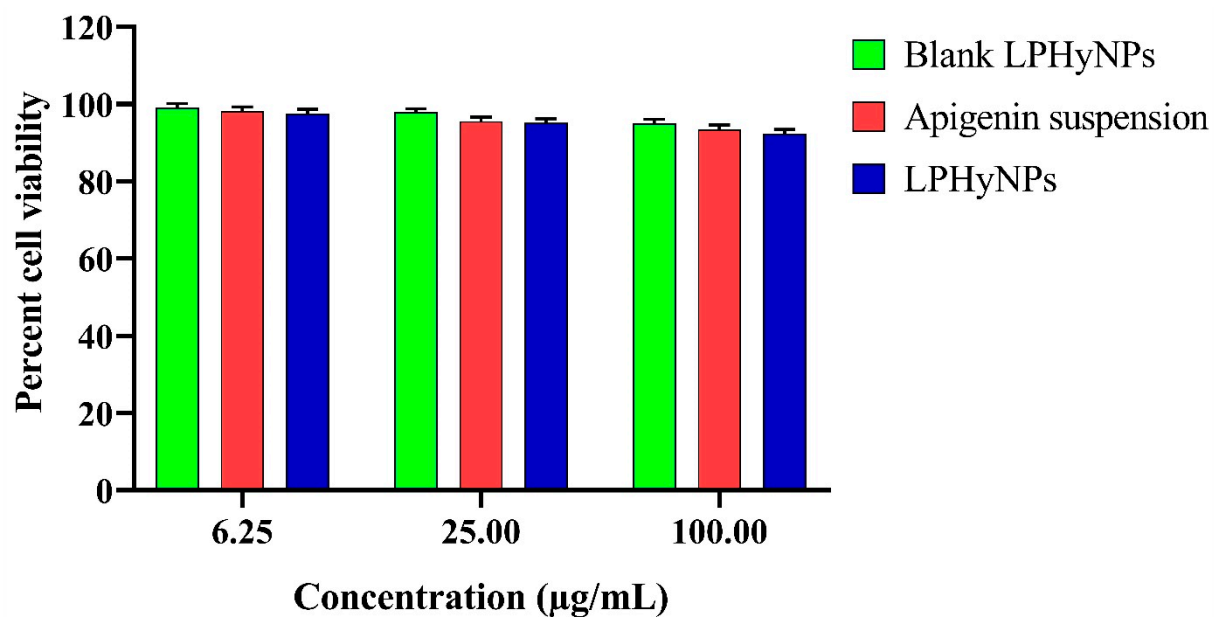

**Supplementary Figure S1.** Cytocompatibility study of blank LPHyNPs, AGN suspension, and LPHyNPs formulations on HEK293 normal cell line via MTT assay. Values are presented as mean  $\pm$  SD (n=3).
